# Supplementary material for: Identification of a Major Locus for Lodging Resistance to Typhoons Using QTL Analysis in Rice
Source: MDPI journal article supplement (doi:10.3390/plants12030449), 2023-01-18
Supplement: s1 [file s1]

**Table S1.** Phenotypic and lodging resistance to typhoon values in the CNDH population and its parents, Cheongcheong and Nagdong.

| Trait          | Parents      |              | DH Population |        |                 |
|----------------|--------------|--------------|---------------|--------|-----------------|
|                | Cheongcheong | Nagdong      | Max.          | Min.   | Mean            |
| TyM            | 1.00         | 0.00         | 1.00          | 0.00   | 0.27 ± 0.44     |
| TyH            | 1.00         | 0.00         | 1.00          | 0.00   | 0.30 ± 0.46     |
| Heading date   | 123          | 110          | 129           | 96     | 112.03 ± 6.90   |
| Panicle length | 21.50 ± 0.70 | 20.60 ± 2.20 | 27.00         | 13.00  | 19.50 ± 2.50    |
| Culm length    | 68.00 ± 4.56 | 65.40 ± 4.67 | 101.10        | 29.60  | 66.19 ± 15.30   |
| Tiller number  | 12.70 ± 0.50 | 9.70 ± 0.70  | 17.70         | 3.30   | 10.95 ± 2.46    |
| Yield          | 712.20       | 317.10       | 670.32        | 153.55 | 394.90 ± 123.73 |

TyM: Typhoon Maysak. TyH: Typhoon Haishen

**Table S2.** Correlation of phenotypic and lodging resistance to typhoon values from the 120 CNDH populations in 2020.

|                | TyM                  | TyH                  | Culm length         | Panicle length      | Heading date | Tiller number | Yield |
|----------------|----------------------|----------------------|---------------------|---------------------|--------------|---------------|-------|
| TyM            | 1.000                |                      |                     |                     |              |               |       |
| TyH            | 0.921 <sup>**</sup>  | 1.000                |                     |                     |              |               |       |
| Culm length    | 0.345 <sup>**</sup>  | 0.386 <sup>**</sup>  | 1.000               |                     |              |               |       |
| Panicle length | 0.363 <sup>**</sup>  | 0.381 <sup>**</sup>  | 0.735 <sup>**</sup> | 1.000               |              |               |       |
| Heading date   | -0.079               | -0.095               | 0.356 <sup>**</sup> | 0.290 <sup>**</sup> | 1.000        |               |       |
| Tiller number  | 0.005                | -0.021               | -0.188 <sup>*</sup> | -0.078              | -0.098       | 1.000         |       |
| Yield          | -0.367 <sup>**</sup> | -0.377 <sup>**</sup> | 0.038               | 0.031               | 0.154        | -0.028        | 1.000 |

TyM: Typhoon Maysak. TyH: Typhoon Haishen

<sup>\*\*</sup> Significant at 0.01 level

<sup>\*</sup> Significant at the 0.05 level

**Table S3.** QTLs related to lodging resistance to typhoons of the CNDH population in 2020.

| Characteristics                   | Locus         | Chromosome | Interval Markers <sup>a</sup> | LOD  | Add. Effect <sup>b</sup> | R <sup>2</sup> <sup>c</sup> | Increasing effects <sup>d</sup> |
|-----------------------------------|---------------|------------|-------------------------------|------|--------------------------|-----------------------------|---------------------------------|
| Lodging resistance<br>by Typhoons | <i>qTyM6</i>  | 6          | RM3343–RM20318                | 3.08 | 0.14                     | 0.32                        | Cheongcheong                    |
|                                   | <i>qTyM11</i> | 11         | RM287–RM27161                 | 2.55 | 0.19                     | 0.40                        | Cheongcheong                    |
|                                   | <i>qTyH6</i>  | 6          | RM3343–RM20318                | 3.17 | 0.14                     | 0.38                        | Cheongcheong                    |
|                                   | <i>qTyH8</i>  | 8          | RM1345–RM264                  | 2.77 | 0.19                     | 0.45                        | Cheongcheong                    |
|                                   | <i>qTyH11</i> | 11         | RM287–RM27161                 | 3.59 | 0.22                     | 0.51                        | Cheongcheong                    |

TyM: Typhoon Maysak. TyH: Typhoon Haishen

<sup>a</sup> Marker intervals are those within the significance threshold on each border of the QTL range.

<sup>b</sup> Additive effect.

<sup>c</sup> Phenotypic variation explains each QTL.

<sup>d</sup> Increase effect is the source of the allele causing an increase in the measured traits.

**Table S4.** The related genes list of the interval markers RM3343-RM20318 for lodging resistance to typhoons using QTL analysis.

| Locus ID     | Description                                                                           |
|--------------|---------------------------------------------------------------------------------------|
| Os06g0594100 | Enoyl-CoA hydratase/isomerase domain containing protein.                              |
| Os06g0594600 | Transferase family protein.                                                           |
| Os06g0595700 | Transposase, IS4 domain containing protein.                                           |
| Os06g0595800 | Transferase family protein.                                                           |
| Os06g0595900 | Transcription elongation factor S-II, central region domain containing protein.       |
| Os06g0597500 | Protein prenyltransferase domain containing protein.                                  |
| Os06g0597600 | Aromatic-ring hydroxylase family protein.                                             |
| Os06g0597800 | FAR1 domain containing protein.                                                       |
| Os06g0597900 | SOUL heme-binding protein family protein.                                             |
| Os06g0599200 | Cytochrome P450 family protein.                                                       |
| Os06g0600400 | Cytochrome P450 family protein.                                                       |
| Os06g0600700 | Agnet domain containing protein.                                                      |
| Os06g0601500 | cAMP response element binding (CREB) protein family protein.                          |
| Os06g0602600 | Alba, DNA/RNA-binding protein family protein.                                         |
| Os06g0602800 | Glycosyl transferase, family 14 protein.                                              |
| Os06g0602900 | Alcohol dehydrogenase superfamily, zinc-containing protein.                           |
| Os06g0604200 | Phospholipase D.                                                                      |
| Os06g0604300 | Phospholipase D.                                                                      |
| Os06g0604500 | Mitochondrial substrate carrier family protein.                                       |
| Os06g0605100 | Zinc finger, BED-type predicted domain containing protein.                            |
| Os06g0605900 | Leucine-rich repeat, cysteine-containing subtype containing protein.                  |
| Os06g0606800 | Targeting for Xklp2 family protein.                                                   |
| Os06g0607200 | Cellular retinaldehyde-binding/triple function, C-terminal domain containing protein. |
| Os06g0607700 | ABC transporter related domain containing protein.                                    |
| Os06g0607900 | No pollen.                                                                            |

|              |                                                                         |
|--------------|-------------------------------------------------------------------------|
| Os06g0608500 | Snf7 family protein.                                                    |
| Os06g0608800 | von Willebrand factor, type A domain containing protein.                |
| Os06g0609600 | EF-Hand type domain containing protein.                                 |
| Os06g0609700 | Esterase/lipase/thioesterase domain containing protein.                 |
| Os06g0610800 | Peptidase A1, pepsin family protein.                                    |
| Os06g0611200 | Protein prenyltransferase domain containing protein.                    |
| Os06g0611400 | Virulence factor, pectin lyase fold family protein.                     |
| Os06g0612200 | RNA polymerase Rpb1, domain 5 containing protein.                       |
| Os06g0613100 | Protein prenyltransferase domain containing protein.                    |
| Os06g0613600 | Cytochrome P450 family protein.                                         |
| Os06g0614000 | C2 calcium/lipid-binding region, CaLB domain containing protein.        |
| Os06g0614100 | Eukaryotic transcription factor, DNA-binding domain containing protein. |
| Os06g0614300 | Cyclase-associated protein domain containing protein.                   |
| Os06g0617800 | Ribose-phosphate pyrophosphokinase 2                                    |
| Os06g0618100 | Zinc finger, CCCH-type domain containing protein.                       |
| Os06g0618700 | VQ domain containing protein.                                           |
| Os06g0619000 | Disease resistance protein family protein.                              |
| Os06g0620600 | Hrf1 family protein.                                                    |
| Os06g0621500 | Disease resistance protein family protein.                              |
| Os06g0621600 | Disease resistance protein family protein.                              |
| Os06g0622300 | AT-rich interaction region domain containing protein.                   |
| Os06g0622700 | Eukaryotic transcription factor, DNA-binding domain containing protein. |
| Os06g0623300 | NAD-dependent epimerase/dehydratase family protein.                     |
| Os06g0624100 | Proteinase inhibitor, propeptide domain containing protein.             |
| Os06g0625200 | Peptidoglycan-binding LysM domain containing protein.                   |
| Os06g0625300 | Peptidoglycan-binding LysM domain containing protein.                   |
| Os06g0625900 | Potassium transporter 10 (OSHAK10).                                     |
| Os06g0626600 | Sulfotransferase family protein.                                        |

|              |                                                                                |
|--------------|--------------------------------------------------------------------------------|
| Os06g0626700 | Isopenicillin N synthase family protein.                                       |
| Os06g0627500 | Leucine-rich repeat, plant specific containing protein.                        |
| Os06g0633300 | Phytosulfokines 1 precursor                                                    |
| Os06g0633500 | Zinc finger, RING-type domain containing protein.                              |
| Os06g0633800 | Amino acid/polyamine transporter II family protein.                            |
| Os06g0633900 | Esterase/lipase/thioesterase domain containing protein.                        |
| Os06g0634100 | Intron maturase, type II family protein.                                       |
| Os06g0636700 | Lipolytic enzyme, G-D-S-L family protein.                                      |
| Os06g0638000 | Zinc finger, CCCH-type domain containing protein.                              |
| Os06g0638300 | Retrotransposon gag protein family protein.                                    |
| Os06g0638500 | Protein kinase domain containing protein.                                      |
| Os06g0639200 | Pathogenesis-related transcriptional factor and ERF domain containing protein. |
| Os06g0639300 | Ankyrin repeat containing protein.                                             |
| Os06g0639800 | Cytochrome P450 family protein.                                                |
| Os06g0640100 | E-class P450, group I family protein.                                          |
| Os06g0640500 | Cytochrome P450 family protein.                                                |
| Os06g0640800 | Cytochrome P450 family protein.                                                |
| Os06g0641100 | Cytochrome P450 family protein.                                                |
| Os06g0641500 | Cytochrome P450 family protein.                                                |
| Os06g0641800 | Cytochrome P450 family protein.                                                |
| Os06g0641900 | Cytochrome P450 family protein.                                                |
| Os06g0642900 | Ubiquitin system component Cue domain containing protein.                      |
| Os06g0643100 | Proteasome subunit beta type 3                                                 |
| Os06g0643600 | Formamidopyrimidine-DNA glycolase family protein.                              |
| Os06g0643700 | Hly-III related proteins family protein.                                       |
| Os06g0644100 | Carboxypeptidase regulatory region domain containing protein.                  |
| Os06g0644300 | Disease resistance protein family protein.                                     |
| Os06g0644500 | Zinc finger, DHHC-type domain containing protein.                              |

|              |                                                                                   |
|--------------|-----------------------------------------------------------------------------------|
| Os06g0644700 | Amino acid/polyamine transporter II family protein.                               |
| Os06g0644800 | Mannose-6-phosphate receptor, binding domain containing protein.                  |
| Os06g0645400 | Aminoacyl-tRNA synthetase, class 1a, anticodon-binding domain containing protein. |
| Os06g0645500 | Sterile alpha motif homology domain containing protein.                           |
| Os06g0645600 | Peptidase S1 and S6, chymotrypsin/Hap domain containing protein.                  |
| Os06g0646000 | SAM (and some other nucleotide) binding motif domain containing protein.          |
| Os06g0646400 | Protein kinase domain containing protein.                                         |
| Os06g0646600 | KNOX family class 2 homeodomain protein.                                          |
| Os06g0649700 | Region of unknown function DM13, Skeletor domain containing protein.              |
| Os06g0649800 | DNA glycosylase family protein.                                                   |
| Os06g0649900 | Phospholipase D/Transphosphatidylase domain containing protein.                   |
| Os06g0650600 | Nonaspanin (TM9SF) family protein.                                                |
| Os06g0650900 | Heat shock protein DnaJ family protein.                                           |
| Os06g0651300 | Zinc finger, C2H2-type domain containing protein.                                 |
| Os06g0652200 | Hly-III related proteins family protein.                                          |
| Os06g0653100 | CD9/CD37/CD63 antigen family protein.                                             |
| Os06g0653200 | Basic helix-loop-helix dimerisation region bHLH domain containing protein.        |
| Os06g0654000 | Peptidase C19, ubiquitin carboxyl-terminal hydrolase 2 family protein.            |
| Os06g0654300 | Histidine kinase, homodimeric domain containing protein.                          |
| Os06g0655200 | Pollen allergen Lol p2 family protein.                                            |
| Os06g0656800 | Beta-Ig-H3/fasciclin domain containing protein.                                   |
| Os06g0658900 | UbiA prenyltransferase family protein.                                            |
| Os06g0659200 | Intron maturase, type II family protein.                                          |
| Os06g0660800 | Protein kinase domain containing protein.                                         |
| Os06g0661000 | Plant MuDR transposase domain containing protein.                                 |
| Os06g0661400 | ANTH domain containing protein.                                                   |
| Os06g0661600 | Zinc finger, DHP-type domain containing protein.                                  |
| Os06g0661700 | RabGAP/TBC domain containing protein.                                             |

|              |                                                                           |
|--------------|---------------------------------------------------------------------------|
| Os06g0662200 | Eukaryotic transcription factor, DNA-binding domain containing protein.   |
| Os06g0662300 | Pollen allergen Lol p2 family protein.                                    |
| Os06g0662500 | Pollen allergen Lol p2 family protein.                                    |
| Os06g0662600 | Pollen allergen Lol p2 family protein.                                    |
| Os06g0662700 | Pollen allergen Lol p2 family protein.                                    |
| Os06g0662800 | Pollen allergen Lol p2 family protein.                                    |
| Os06g0662900 | Pollen allergen/expansin, C-terminal domain containing protein.           |
| Os06g0663300 | Pollen allergen Lol p2 family protein.                                    |
| Os06g0663500 | SBP domain containing protein.                                            |
| Os06g0663600 | Endonuclease V family protein.                                            |
| Os06g0664200 | Inositol phosphatase/fructose-1,6-bisphosphatase family protein.          |
| Os06g0664400 | HMG-I and HMG-Y, DNA-binding domain containing protein.                   |
| Os06g0665500 | Amidase, hydantoinase/carbamoylase family protein.                        |
| Os06g0665800 | ATPase, P-type, K/Mg/Cd/Cu/Zn/Na/Ca/Na/H-transporter family protein.      |
| Os06g0665900 | Thioredoxin domain 2 containing protein.                                  |
| Os06g0666400 | VQ domain containing protein.                                             |
| Os06g0667200 | MADS30.                                                                   |
| Os06g0669800 | Ovarian tumour, otubain domain containing protein.                        |
| Os06g0671300 | Cytochrome P450 family protein.                                           |
| Os06g0671800 | Cellular retinaldehyde binding/alpha-tocopherol transport family protein. |
| Os06g0677000 | Patatin family protein.                                                   |
| Os06g0677300 | RINGv domain containing protein.                                          |
| Os06g0677400 | Hydroxyacid dehydrogenase/reductase family protein.                       |
| Os06g0677500 | Protein prenyltransferase domain containing protein.                      |
| Os06g0679100 | Cdc23 domain containing protein.                                          |
| Os06g0679800 | Heat shock protein Hsp70 family protein.                                  |
| Os06g0680700 | Cytochrome P450 family protein.                                           |
| Os06g0681200 | Cupredoxin domain containing protein.                                     |



|              |                                                                                |
|--------------|--------------------------------------------------------------------------------|
| Os06g0681300 | PAK-box/P21-Rho-binding domain containing protein.                             |
| Os06g0681400 | Polyubiquitin.                                                                 |
| Os06g0681600 | Haem peroxidase family protein.                                                |
| Os06g0682800 | Zinc finger, CCCH-type domain containing protein.                              |
| Os06g0682900 | (2R)-phospho-3-sulfolactate synthase, ComA family protein.                     |
| Os06g0683000 | Zinc finger, C2H2-type domain containing protein.                              |
| Os06g0683100 | NAD-dependent epimerase/dehydratase family protein.                            |
| Os06g0683500 | Ribonuclease H domain containing protein.                                      |
| Os06g0685300 | C2 domain containing protein.                                                  |
| Os06g0686400 | Plant lipid transfer protein/Par allergen family protein.                      |
| Os06g0686500 | Peptidase M3A and M3B, thimet/oligopeptidase F domain containing protein.      |
| Os06g0687100 | Ras GTPase family protein.                                                     |
| Os06g0687200 | Zinc finger, RING-type domain containing protein.                              |
| Os06g0687500 | RNA-binding region RNP-1 (RNA recognition motif) domain containing protein.    |
| Os06g0687900 | Glycosyl transferase, family 43 protein.                                       |
| Os06g0688100 | RNA polymerase I specific transcription initiation factor RRN3 family protein. |
| Os06g0690200 | Protein kinase domain containing protein.                                      |
| Os06g0690900 | Protein prenyltransferase domain containing protein.                           |
| Os06g0691000 | DNA repair protein, Rev1 family protein.                                       |
| Os06g0691100 | Pathogenesis-related transcriptional factor and ERF domain containing protein. |
| Os06g0691600 | EF-Hand type domain containing protein.                                        |
| Os06g0692700 | Leucine rich repeat, N-terminal domain containing protein.                     |
| Os06g0693100 | Disease resistance protein family protein.                                     |
| Os06g0693500 | Zinc finger, C2H2-type domain containing protein.                              |
| Os06g0694200 | Lipolytic enzyme, G-D-S-L family protein.                                      |
| Os06g0695300 | Haem peroxidase, plant/fungal/bacterial family protein.                        |
| Os06g0695400 | Haem peroxidase family protein.                                                |
| Os06g0695600 | Zinc finger, RING-type domain containing protein.                              |

|              |                                                                             |
|--------------|-----------------------------------------------------------------------------|
| Os06g0695700 | Calmodulin-binding, plant family protein.                                   |
| Os06g0695800 | ABC transporter related domain containing protein.                          |
| Os06g0695900 | Zinc finger, RING-type domain containing protein.                           |
| Os06g0696900 | Appr-1-p processing domain containing protein.                              |
| Os06g0697200 | DEAD/DEAH box helicase domain containing protein.                           |
| Os06g0697400 | RNA polymerase Rpb8 family protein.                                         |
| Os06g0697500 | AAA ATPase domain containing protein.                                       |
| Os06g0697600 | AAA ATPase domain containing protein.                                       |
| Os06g0698300 | Protein phosphatase 2C family protein.                                      |
| Os06g0698400 | RNA-binding region RNP-1 (RNA recognition motif) domain containing protein. |
| Os06g0698600 | Exo70 exocyst complex subunit family protein.                               |
| Os06g0698900 | Zinc finger, GATA-type domain containing protein.                           |
| Os06g0699400 | MAP kinase 2.                                                               |
| Os06g0699500 | Macrophage migration inhibitory factor family protein.                      |
| Os06g0699600 | CCT domain containing protein.                                              |
| Os06g0700000 | Proteinase inhibitor, propeptide domain containing protein.                 |
| Os06g0700100 | Protein prenyltransferase domain containing protein.                        |
| Os06g0701100 | Eukaryotic initiation factor 4A (eIF4A) (eIF-4A).                           |
| Os06g0701200 | UTP--glucose-1-phosphate uridylyltransferase family protein.                |
| Os06g0701300 | Beta-lactamase family protein.                                              |
| Os06g0701600 | Cation transporter family protein.                                          |
| Os06g0701700 | HKT-type transporter (Sodium ion transporter).                              |
| Os06g0701900 | Auxin responsive SAUR protein family protein.                               |
| Os06g0702000 | Auxin responsive SAUR protein family protein.                               |
| Os06g0702100 | Zinc finger, CW-type domain containing protein.                             |

---

**Table S5.** Comparison of the QTLs for lodging resistance to typhoons with our previous studies using the CNDH population.

| Characteristics                          | Locus            | Chromosome | Interval Markers | LOD  |
|------------------------------------------|------------------|------------|------------------|------|
| Lodging resistance to typhoons           | <i>qTyM6</i>     | 6          | RM3343–RM20318   | 3.08 |
|                                          | <i>qTyM11</i>    | 11         | RM287–RM27161    | 2.55 |
|                                          | <i>qTyH6</i>     | 6          | RM3343–RM20318   | 3.17 |
|                                          | <i>qTyH11</i>    | 11         | RM287–RM27161    | 3.59 |
| Pushing strength of the lower stem       | <i>qPSLSA6-2</i> | 6          | RM439–RM20318    | 3.23 |
|                                          | <i>qPSLSB6-5</i> | 6          | RM439–RM20318    | 3.13 |
| Length of the third internode            | <i>qLTI6-2</i>   | 6          | RM439–RM20318    | 3.65 |
| Stem diameter at the uppermost internode | <i>qSDUIII-1</i> | 11         | RM287–RM27161    | 2.56 |

TyM: Typhoon Maysak. TyH: Typhoon Haishen. PSLSA: pushing strength of the lower stem after the heading date. PSLSB: pushing strength of the lower stem before the heading date. LTI: length of the third internode. SDUI: stem diameter at the uppermost internode.
